# Supplementary material for: Does non-thermal plasma modify biopolymers in solution? A chemical and mechanistic study for alginate
Source: Royal Society of Chemistry journal article supplement (doi:10.1039/d3bm00212h), 2023-01-01
Supplement: d3bm00212h1.pdf [file d3bm00212h1.pdf]

## Electronic Supplementary Information

### Does non-thermal plasma modify biopolymers in solution? A chemical and mechanistic study for alginate

Francesco Tampieri<sup>1,2,3</sup>, Albert Espona-Noguera<sup>1,2,3</sup>, Cédric Labay<sup>1,2,3</sup>, Maria-Pau Ginebra<sup>1,2,4</sup>, Maksudbek Yusupov<sup>5,6,7,8</sup>, Annemie Bogaerts<sup>8</sup> and Cristina Canal<sup>1,2,3</sup>

<sup>1</sup> Biomaterials, Biomechanics and Tissue Engineering Group, Department of Materials Science and Engineering and Research Centre for Biomedical Engineering, Universitat Politècnica de Catalunya · BarcelonaTech (UPC), 08019 Barcelona, Spain.

<sup>2</sup> Barcelona Research Centre in Multiscale Science and Engineering, Universitat Politècnica de Catalunya · BarcelonaTech (UPC), 08019 Barcelona, Spain.

<sup>3</sup> Institut de Recerca Sant Joan de Déu, 08034 Barcelona, Spain.

<sup>4</sup> Institute for Bioengineering of Catalonia, 08028 Barcelona, Spain.

<sup>5</sup> School of Engineering, New Uzbekistan University, 100007 Tashkent, Uzbekistan.

<sup>6</sup> Department of Power Supply and Renewable Energy Sources, National Research University TIIAME, 100000 Tashkent, Uzbekistan.

<sup>7</sup> Laboratory of Thermal Physics of Multiphase Systems, Arifov Institute of Ion-Plasma and Laser Technologies, Academy of Sciences of Uzbekistan, 100125 Tashkent, Uzbekistan.

<sup>8</sup> Research group PLASMANT, Department of Chemistry, University of Antwerp, 2610 Antwerp, Belgium

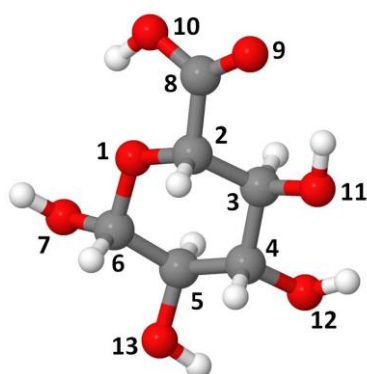

**Figure S1.** Molecular structure of the glucuronic acid. The carbon, oxygen and hydrogen atoms are illustrated in gray, red and white colors, respectively. Some atoms are numbered for reference in Table S1.

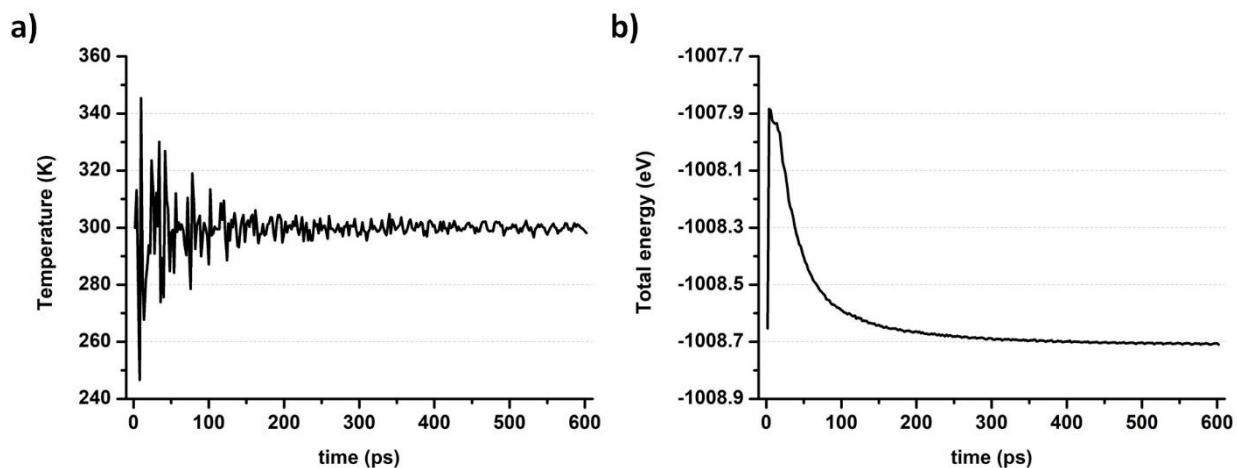

**Figure S2.** Time evolution of the temperature and total energy of the glucuronic acid model system.

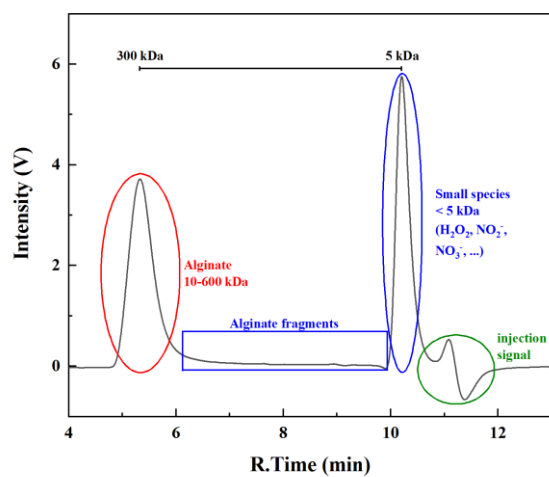

**Figure S3.** Typical chromatogram of  $0.5 \text{ g L}^{-1}$  alginate solution treated by non-thermal plasma (NTP). The different regions of the chromatogram are highlighted and assigned. The black bar on top represents the separation limits of the column.

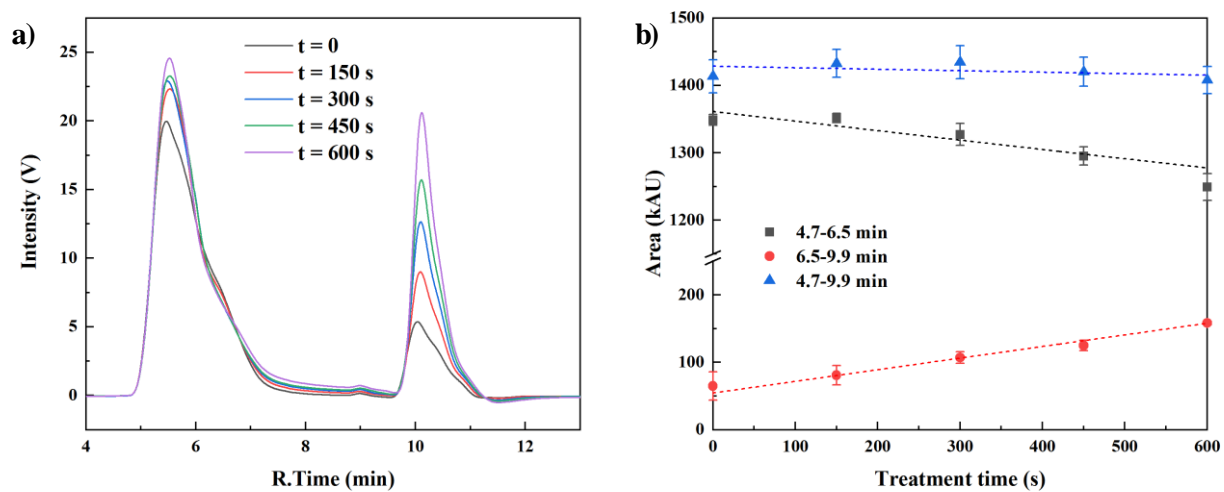

**Figure S4.** a) Chromatograms of 5 g L<sup>-1</sup> alginate solutions treated by NTP for different times; b) areas of different portions of the chromatograms as a function of the treatment time. The dashed lines are exponential (black and red) or linear (blue) fits.

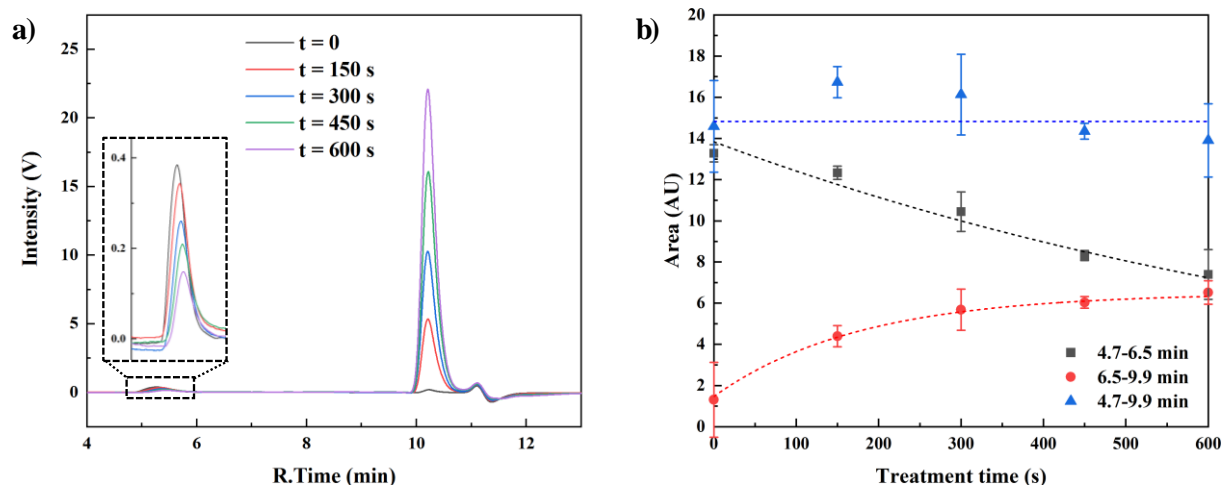

**Figure S5.** a) Chromatograms of 0.05 g L<sup>-1</sup> alginate solutions treated by NTP for different times; the inset is an enlargement of the peak at 5.5 min; b) areas of different portions of the chromatograms as a function of the treatment time; the dashed lines are exponential (black and red) or linear (blue) fits.

**Table S1.** Overview of all the reaction mechanisms observed in the DFTB-MD simulations after the interaction of O atoms with glucuronic acid. The numbering of the various atoms corresponds to Figure S4 below. Note that most of these reactions are initiated by H-abstraction, but the latter can occur at different C or O atoms, as indicated by the second column. Color code: dark green = events that happen with frequency higher than 7.9%; light green = events that happen with frequency between 5.0 and 7.9%; yellow = events that happen with frequency between 2.0 and 4.9%; white = events that happen with frequency lower than 2%.

| No. | H-abstraction | N° events | Description     | Structure | %   |
|-----|---------------|-----------|-----------------|-----------|-----|
| 1   | C2            | 16        | C2-OH formation |           | 8   |
| 2   | C3            | 11        | C3-OH formation |           | 5.5 |
| 3   | C4            | 9         | C4-OH formation |           | 4.5 |

|    |            |    |                                                                                                                                         |                                                                                       |     |
|----|------------|----|-----------------------------------------------------------------------------------------------------------------------------------------|---------------------------------------------------------------------------------------|-----|
| 4  | C5         | 5  | C5-OH formation                                                                                                                         | 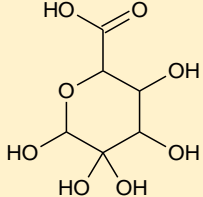   | 2.5 |
| 5  | C6         | 19 | C6-OH formation                                                                                                                         |    | 9.5 |
| 6  | O7         | 17 | O7-OH formation                                                                                                                         |    | 8.5 |
| 7  | O10        | 6  | O10-OH formation                                                                                                                        |   | 3   |
| 8  | O11        | 13 | O11-OH formation                                                                                                                        |  | 6.5 |
| 9  | O12        | 19 | O12-OH formation                                                                                                                        |  | 9.5 |
| 10 | O13        | 10 | O13-OH formation                                                                                                                        |  | 5   |
| 11 | O7 and O10 | 12 | liberation of H <sub>2</sub> O and CO <sub>2</sub> ,<br>breaking of C2-C8 and C6-O1 bonds,<br>formation of C6=O7 and C2=O1 double bonds |  | 6   |

|    |             |   |                                                                                                                                                           |                                                                                       |     |
|----|-------------|---|-----------------------------------------------------------------------------------------------------------------------------------------------------------|---------------------------------------------------------------------------------------|-----|
| 12 | O7 and O10  | 2 | liberation of H <sub>2</sub> O and CO <sub>2</sub> ,<br>breaking of C2-C8, C5-C6 and C3-C4 bonds,<br>formation of C4=C5, C2=C3 and C6=O7 double<br>bonds  | 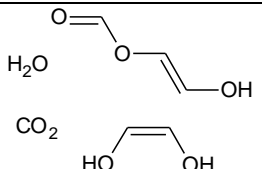   | 1   |
| 13 | O7 and O11  | 1 | liberation of H <sub>2</sub> O,<br>breaking of C5-C6 and C3-C4 bonds,<br>formation of C4=C5, C6=O7 and C3=O11 double<br>bonds                             |    | 0.5 |
| 14 | O7 and O12  | 1 | liberation of H <sub>2</sub> O,<br>breaking of C5-C6 bond,<br>formation of C5-O12 bond                                                                    |    | 0.5 |
| 15 | O7 and O13  | 8 | liberation of H <sub>2</sub> O,<br>C5-C6 bond breaking,<br>formation of C5=O13 and C6=O7 double<br>bonds                                                  |    | 4   |
| 16 | O10 and O11 | 1 | liberation of H <sub>2</sub> O and CO <sub>2</sub> ,<br>breaking of C2-C8 bond,<br>formation of C2-O11 bond                                               |  | 0.5 |
| 17 | O10 and O12 | 1 | liberation of H <sub>2</sub> O and CO <sub>2</sub> ,<br>breaking of C2-C8, C4-C5 and C6-O1 bonds,<br>formation of C2=O1, C4=O12 and C5=C6 double<br>bonds |  | 0.5 |
| 18 | O11 and O12 | 9 | liberation of H <sub>2</sub> O,<br>breaking of C3-C4 bond,<br>formation of C3=O11 and C4=O12 double<br>bonds                                              |  | 4.5 |
| 19 | O12 and O13 | 4 | liberation of H <sub>2</sub> O,<br>breaking of C4-C5 bond,<br>formation of C4=O12 and C5=O13 double<br>bonds                                              |  | 2   |

|    |            |   |                                                                                                                   |                                                                                       |     |
|----|------------|---|-------------------------------------------------------------------------------------------------------------------|---------------------------------------------------------------------------------------|-----|
| 20 | O7         | 3 | binding to O1,<br>breaking of C6-O1 bond,<br>formation of C6=O7 double bond and O1-OH bond                        | 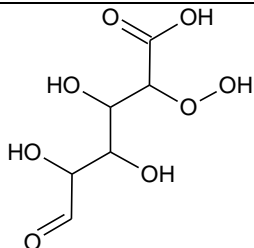   | 1.5 |
| 21 | O10        | 1 | liberation of CO <sub>2</sub> ,<br>breaking of C2-C8 bond,<br>formation of C2-OH bond                             |    | 0.5 |
| 22 | C2 and O10 | 1 | liberation of H <sub>2</sub> O and CO <sub>2</sub> ,<br>breaking of C2-C8 bond                                    |    | 0.5 |
| 23 | C3 and O10 | 1 | liberation of H <sub>2</sub> O and CO <sub>2</sub> ,<br>breaking of C2-C8 bond,<br>formation of C2=C3 double bond |    | 0.5 |
| 24 | C4 and O10 | 1 | liberation of H <sub>2</sub> O and CO <sub>2</sub> ,<br>breaking of C3-C4 bond,<br>formation of C2=C3 double bond |   | 0.5 |
| 25 | C5 and O7  | 1 | liberation of H <sub>2</sub> O,<br>breaking of C5-C6 bond,<br>formation of C6=O7 double bond                      |  | 0.5 |
| 26 | C5 and O13 | 2 | liberation of H <sub>2</sub> O,<br>formation of C5=O13 double bond                                                |  | 1   |
| 27 | C6 and O7  | 4 | liberation of H <sub>2</sub> O,<br>formation of C6=O7 double bond                                                 |  | 2   |

|              |            |            |                                                                                                                              |                                                                                       |            |
|--------------|------------|------------|------------------------------------------------------------------------------------------------------------------------------|---------------------------------------------------------------------------------------|------------|
| 28           | C6 and O10 | 1          | liberation of H <sub>2</sub> O and CO <sub>2</sub> ,<br>breaking of C2-C8 and C6-O1 bonds,<br>formation of C2=O1 double bond | 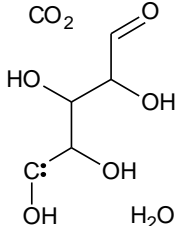   | 0.5        |
| 29           | -          | 6          | binding to O9                                                                                                                |    | 3          |
| 30           | -          | 5          | binding to O11                                                                                                               |    | 2.5        |
| 31           | -          | 7          | binding to O12                                                                                                               |   | 3.5        |
| 32           | -          | 1          | binding to O13                                                                                                               |  | 0.5        |
| 33           | -          | 1          | binding to C8 and O9<br>(C8=O9 → C8-O9 and C8-O)                                                                             |  | 0.5        |
| 34           | -          | 1          | binding to C8 and C2,<br>breaking of C2-C8 bond,<br>formation of C2-O-C8 bond                                                |  | 0.5        |
| <b>TOTAL</b> |            | <b>200</b> |                                                                                                                              |                                                                                       | <b>100</b> |
